# Supplementary material for: The development of a hemicyanine-based ratiometric CO fluorescent probe with a long emission wavelength and its applications for imaging COin vitroandin vivo
Source: Royal Society of Chemistry journal article supplement (doi:10.1039/d0nj00677g), 2020-01-01
Supplement: d0nj00677g1.pdf [file d0nj00677g1.pdf]

*Supporting Information for*

**The development of a hemicyanine-based ratiometric CO fluorescent probe with long emission and its applications for imaging CO *in vitro* and *in vivo***

Yunyan Zhang <sup>a</sup>, Xiuqi Kong <sup>a</sup>, Yonghe Tang <sup>b</sup>, Min Li <sup>a</sup>, Yaguang Yin <sup>a</sup>, and Weiyang Lin<sup>\*, a, b</sup>

<sup>a</sup> Institute of Fluorescent Probes for Biological Imaging, School of Chemistry and Chemical Engineering, School of Materials Science and Engineering, University of Jinan, Jinan, Shandong 250022, P.R. China.

<sup>b</sup> Institute of Optical Materials and Chemical Biology, School of Chemistry and Chemical Engineering, Guangxi University, Nanning, Guangxi, 530004, P.R. China

Email: weiyanglin2013@163.com.

## Table of contents

|                                     |     |
|-------------------------------------|-----|
| 1. Materials and apparatus.....     | S3. |
| 2. Synthesis of <b>Hcy-OH</b> ..... | S3  |
| 3. Synthesis of <b>Hcy-CO</b> ..... | S4  |
| 4. Table S1.....                    | S5  |
| 5. Fig. S1.....                     | S6  |
| 6. Fig. S2.....                     | S6  |
| 7. Fig. S3.....                     | S6  |
| 8. Fig. S4.....                     | S7  |
| 9. Fig. S5.....                     | S7  |
| 10. Fig. S6.....                    | S8  |
| 11. Fig. S7.....                    | S8  |
| 12. Fig. S8.....                    | S9  |
| 13. Fig. S9.....                    | S9  |
| 14. Reference.....                  | S10 |

## 1. Materials and apparatus.

NMR data were obtained with an AVANCE III 400 MHz Digital NMR spectrometer with tetramethylsilane (TMS) as an internal standard. High Resolution Mass Spectrometric (HRMS) results were obtained at an Agilent 1100 HPLC/MSD spectrometer. The pH experiments were conducted using a Mettler-Toledo Delta 320 pH meter. Absorption experiments were carried out on a Shimadzu UV-2700 spectrometer. Photoluminescent spectra were harvested with a HITACHI F4600 fluorescence spectrophotometer. Biological imaging experiments were accomplished using Nikon A1 fluorescence microscopy with a femtosecond laser.

## 2. Synthesis of Hcy-OH

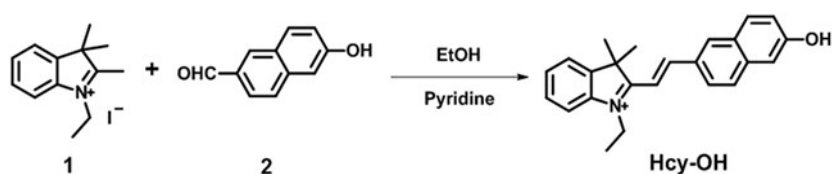

The synthesis of **Hcy-OH** was according to previously reported method<sup>1-3</sup>. Compound **1** (441 mg, 1.4 mmol)<sup>2,3</sup> and compound **2** (200 mg, 1.16 mmol) was dissolved in absolute ethanol (40 mL), then added four drops of pyridine to the solution, after the mixture was refluxed for 4 hours under the nitrogen atmosphere. The mixture was cooled to room temperature, product precipitated from solution. Then the solvent was removed by reduced pressure and the residue purified by silica gel chromatography (DCM: MeOH = 50: 1) to acquire compound **3** as an orange-red solid. <sup>1</sup>H NMR (400 MHz, DMSO-*d*<sub>6</sub>) δ 8.71 – 8.57 (m, 2H), 8.31 (dd, *J* = 9.0, 2.0 Hz, 1H), 7.99 – 7.84 (m, 4H), 7.77 – 7.59 (m, 3H), 7.29 – 7.19 (m, 2H), 4.75 (q, *J* = 7.3 Hz, 2H), 1.85 (s, 6H), 1.49 (t, *J* = 7.2 Hz, 3H).

### 3. Synthesis of Hcy-CO.

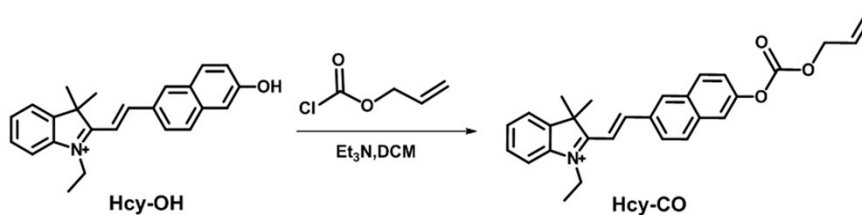

At 0°C, Hcy-OH (140 mg, 0.3 mmol) and triethylamine (0.15 mL) were dissolved in anhydrous dichloromethane (15 mL), then dropwise allyl chloroformate (35.7mg, 0.3mmol). under the nitrogen atmosphere, the mixture was stirred at room temperature for 12 hours, and purified by column chromatography (DCM: MeOH = 50: 1) to acquire target probe (**Hcy-CO**). <sup>1</sup>H NMR (400 MHz, Chloroform-*d*) δ 9.02 (s, 1H), 8.42 – 8.26 (m, 3H), 8.10 (d, *J* = 16.1 Hz, 1H), 7.94 (d, *J* = 8.6 Hz, 1H), 7.72 – 7.57 (m, 5H), 7.41 (dd, *J* = 8.9, 2.4 Hz, 1H), 6.06 (ddt, *J* = 16.5, 10.4, 5.9 Hz, 1H), 5.49 (dt, *J* = 17.1, 1.4 Hz, 1H), 5.40 (dd, *J* = 10.4, 1.3 Hz, 1H), 5.15 (q, *J* = 7.3 Hz, 2H), 4.82 (dt, *J* = 5.9, 1.4 Hz, 2H), 2.65 (s, 1H), 2.12 (s, 1H), 1.91 (s, 6H), 1.68 (t, *J* = 7.3 Hz, 3H), 1.28 (s, 2H). <sup>13</sup>C NMR (101 MHz, Chloroform-*d*) δ 181.35 , 154.99 , 151.29 , 143.53 , 136.50 , 134.43 , 132.06 , 131.25 , 131.17 , 130.93 , 130.05 , 129.78 , 129.05 , 126.75 , 122.84 , 121.80 , 119.82 , 118.07 , 114.89 , 112.81 , 77.26 , 69.46 , 52.60 , 44.57 , 27.09 , 14.61 .

**Table S1** Properties of the representative ratiometric CO fluorescent probes

| <b>Probe</b>        | <b>Em1/ nm</b> | <b>Em2/ nm</b> | <b>Reference</b>                                                                                     |
|---------------------|----------------|----------------|------------------------------------------------------------------------------------------------------|
| <b>Hey-CO</b>       | 515 nm         | 600 nm         | This work                                                                                            |
| <b>Cou-Flavone</b>  | 555 nm         | 475 nm         | Chem. Commun.,<br>55(2019),8987-<br>8990                                                             |
| <b>Probe 1</b>      | 472 nm         | 545 nm         | Sensors &<br>Actuators: B.,<br>251(2017), 389-<br>395                                                |
| <b>Ratio-CO</b>     | 455 nm         | 545 nm         | New J. Chem.,<br>42(2018), 14417-<br>14423                                                           |
| <b>Probe 1</b>      | 510 nm         | 566 nm         | Tetrahedron<br>Letters,<br>55(2014),2537-<br>2540                                                    |
| <b>NIR-Ratio-CO</b> | 592 nm         | 655 nm         | Spectrochimica<br>Acta Part A:<br>Molecular and<br>Biomolecular<br>Spectroscopy 227<br>(2020) 117657 |
| <b>QCy7-CO</b>      | 570 nm         | 715 nm         | Sensors &<br>Actuators: B.,<br>301(2019), 127075                                                     |

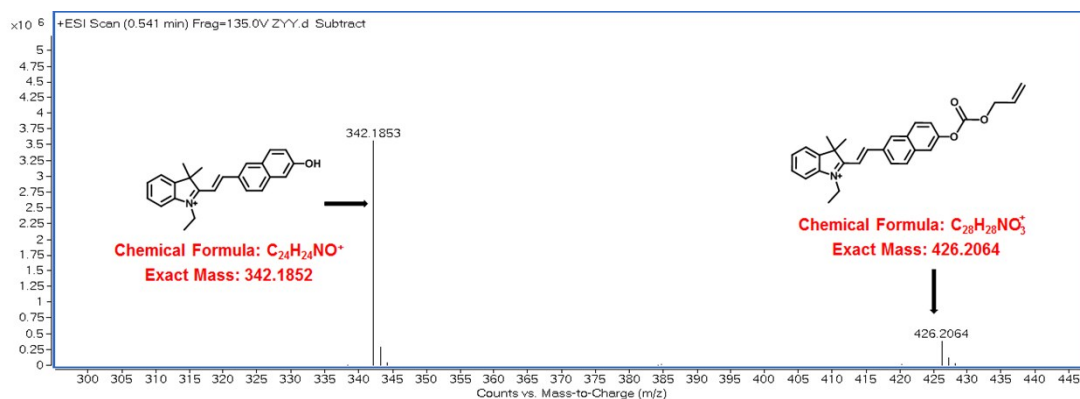

**Fig. S1.** The HRMS mechanism for **Hcy-CO** (10  $\mu\text{M}$ ), PdCl<sub>2</sub> (10  $\mu\text{M}$ ) in the presence of CORM-2 (70  $\mu\text{M}$ ).

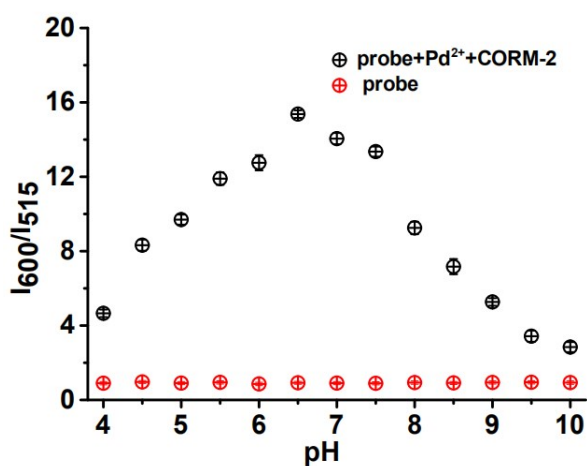

**Fig. S2.** Fluorescence intensity ratio changes ( $I_{600}/I_{515}$ ) of **Hcy-CO** (10  $\mu\text{M}$ ) in the absence and presence of CORM-2 (70  $\mu\text{M}$ ) at various pH conditions.

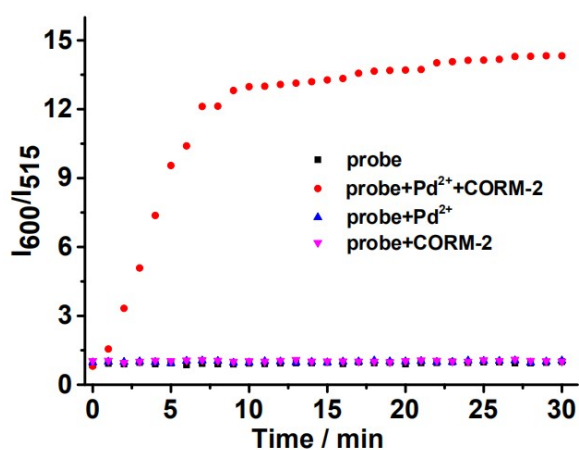

**Fig.S3.** Fluorescent stability change of **Hcy-CO** (10  $\mu\text{M}$ )+PdCl<sub>2</sub> (10  $\mu\text{M}$ ) with or without CORM-

2 (70  $\mu\text{M}$ ) under photon irradiation.

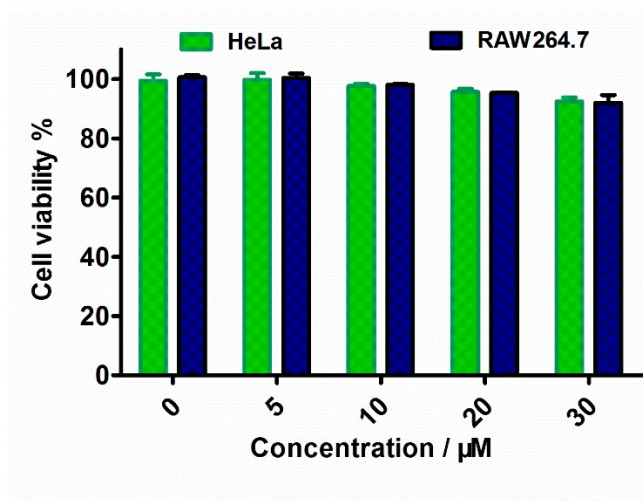

**Fig. S4.** Survival of HeLa cells and RAW 264.7 cells in the presence of **Hcy-CO** at various concentrations measured using MTT assay.

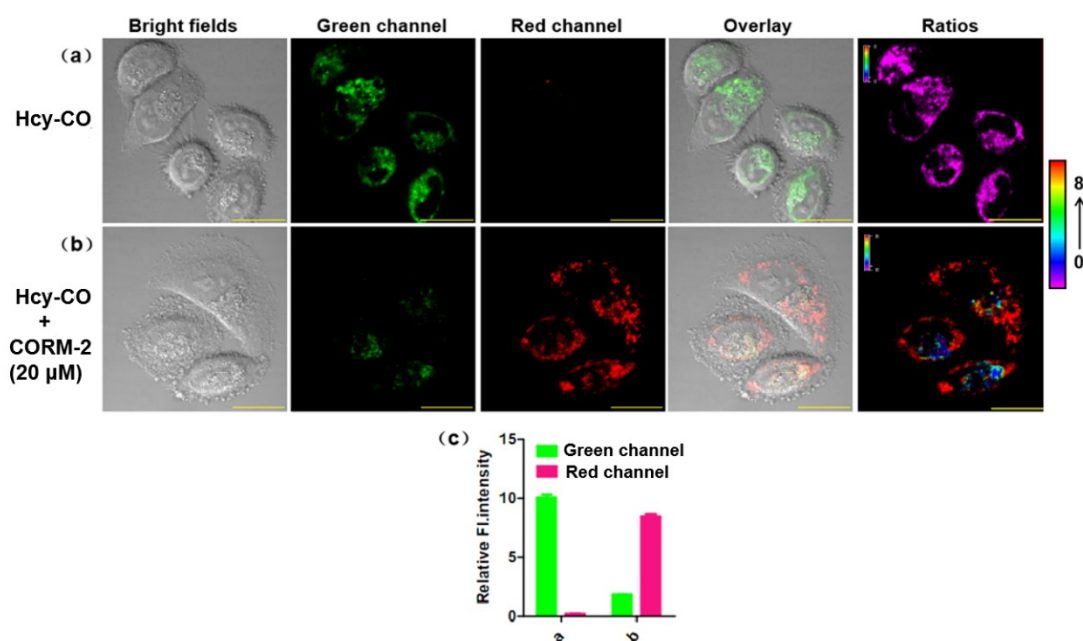

**Fig. S5.** Fluorescent imaging of **Hcy-CO** in HeLa cells for detecting exogenous CO. (a) RAW 264.7 cells were treated with 10  $\mu\text{M}$  **Hcy-CO**+PdCl<sub>2</sub> (10  $\mu\text{M}$ ) for 30 min. (b) HeLa cells were pre-treated with probe system (**Hcy-CO**+PdCl<sub>2</sub>, 10  $\mu\text{M}$  each) for 30 min and subsequently incubated with 20  $\mu\text{M}$  CORM-2 for 30 min. (c) Quantified fluorescence intensities of cells in the green channel and red channel respectively.  $\lambda_{\text{ex}} = 405 \text{ nm}$ ,  $\lambda_{\text{em1}}$  (Green channel) = 500–540 nm;  $\lambda_{\text{em2}}$  (Red channel) = 570–620 nm. Scale bar = 20  $\mu\text{m}$ .

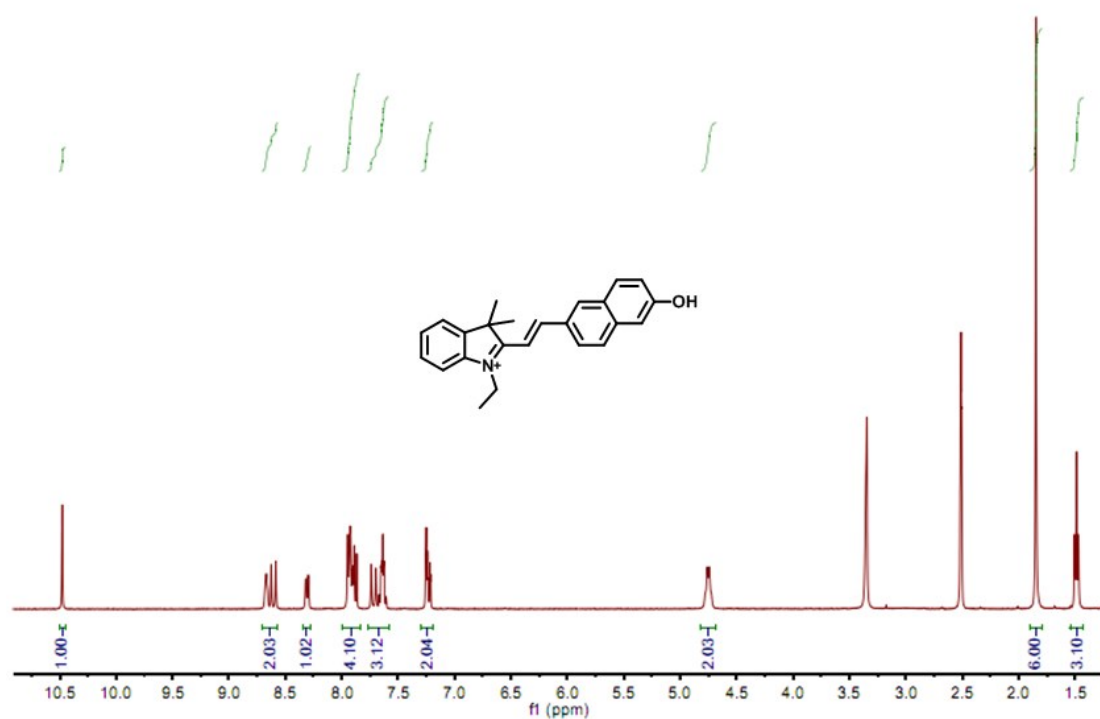

Fig. S6. <sup>1</sup>H NMR spectrum of Hcy-OH in DMSO-*d*<sub>6</sub>.

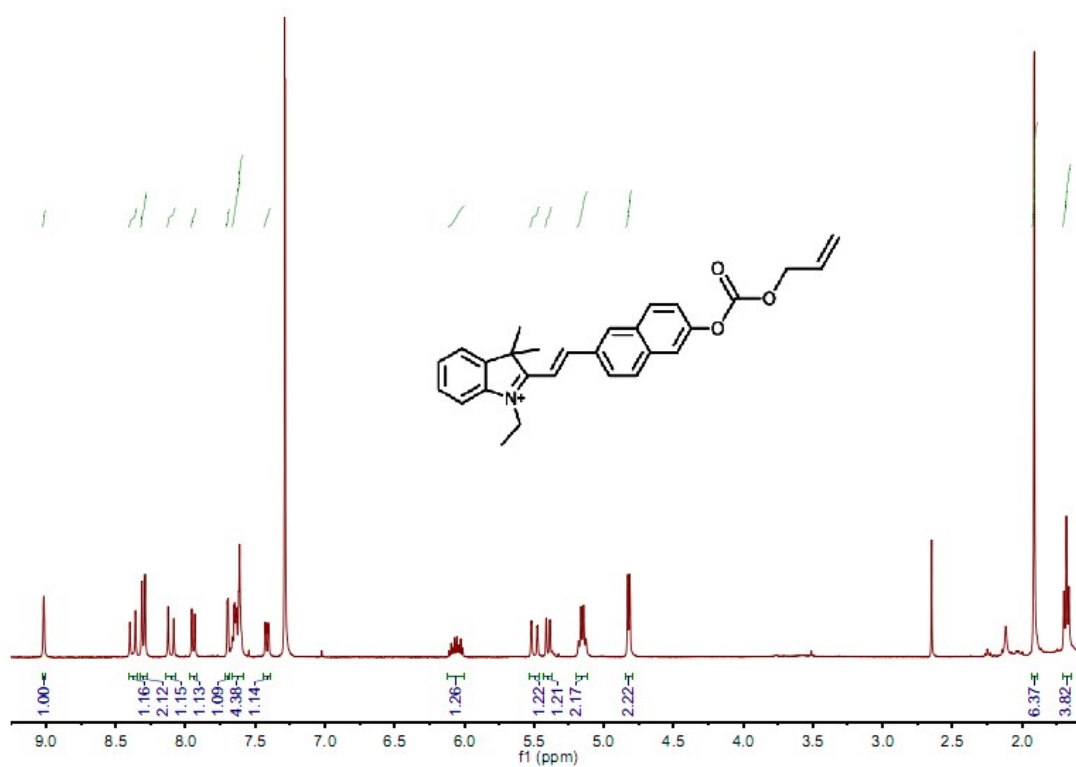

Fig. S7. <sup>1</sup>H NMR spectrum of Hcy-CO in CDCl<sub>3</sub>.



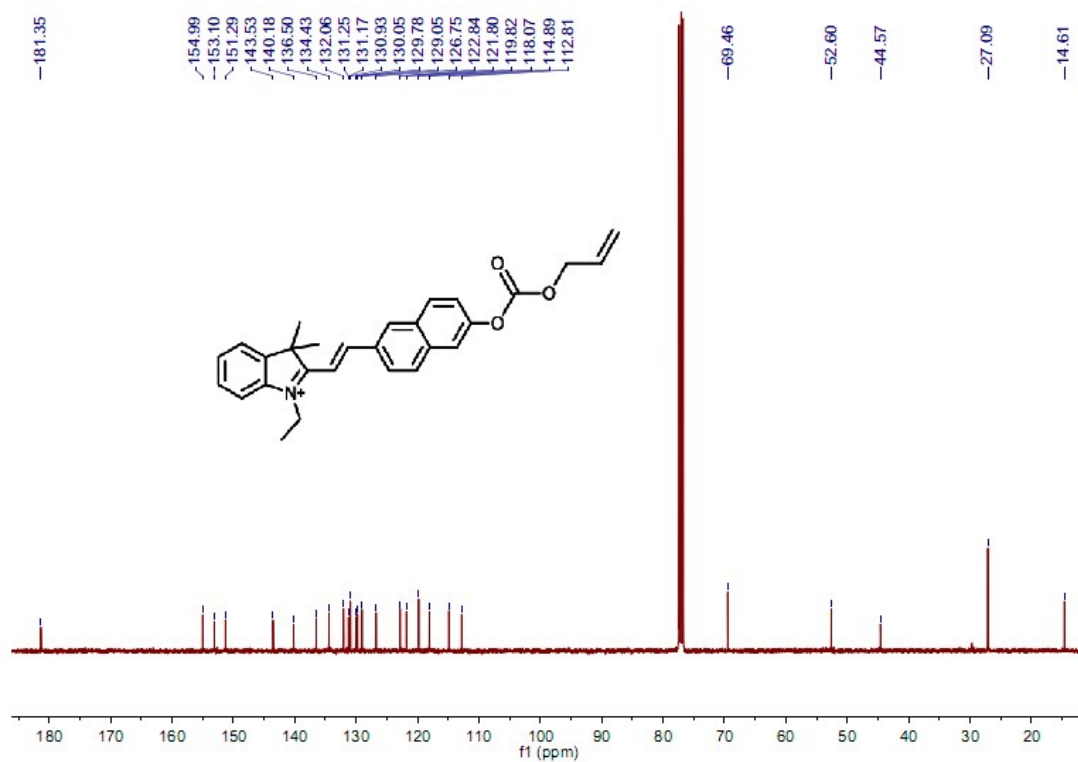

Fig. S8. <sup>13</sup>CNMR spectrum of Hcy-CO in CDCl<sub>3</sub>.

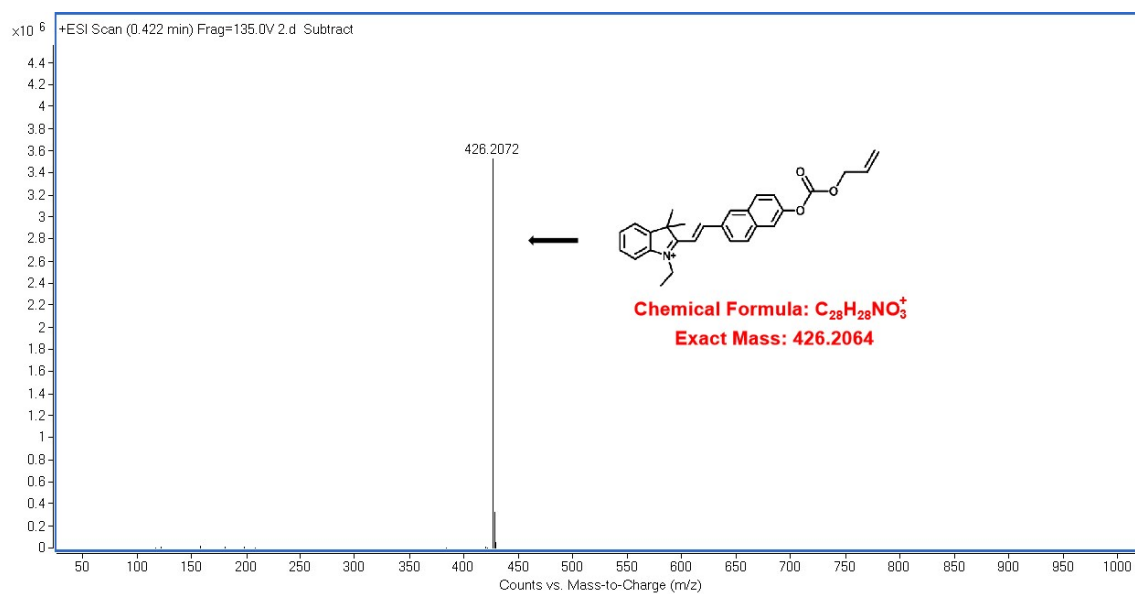

Fig. S9. The HRMS spectrum of Hcy-CO.

## References

1. G. Liu, D. Liu, X. Han, X. Sheng, Z. Xu, S. H. Liu, L. Zeng and J. Yin, *Talanta*, 2017, **170**, 406-412.
2. F. Hu, M. Cao, X. Ma, S.H. Liu, J. Yin, *J. Org. Chem.* 2015, **80**, 7830–7835.
3. D. Verga, M. Nadai, F. Doria, C. Percivalle, M.D. Antonio, M. Palumbo, et al., *J. Am. Chem. Soc.* 2010, **132**, 14625–14637.
